# Supplementary material
Source: PubMed Central journal article supplement (PMC3321585)

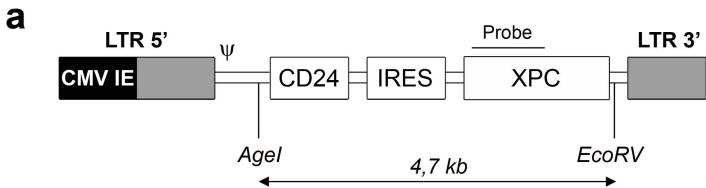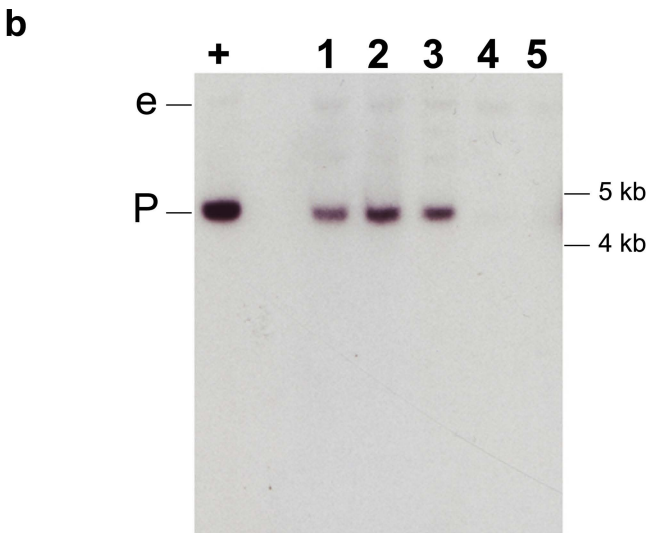

Supplement: mt2011233x1.pdf [file mt2011233x1.pdf]

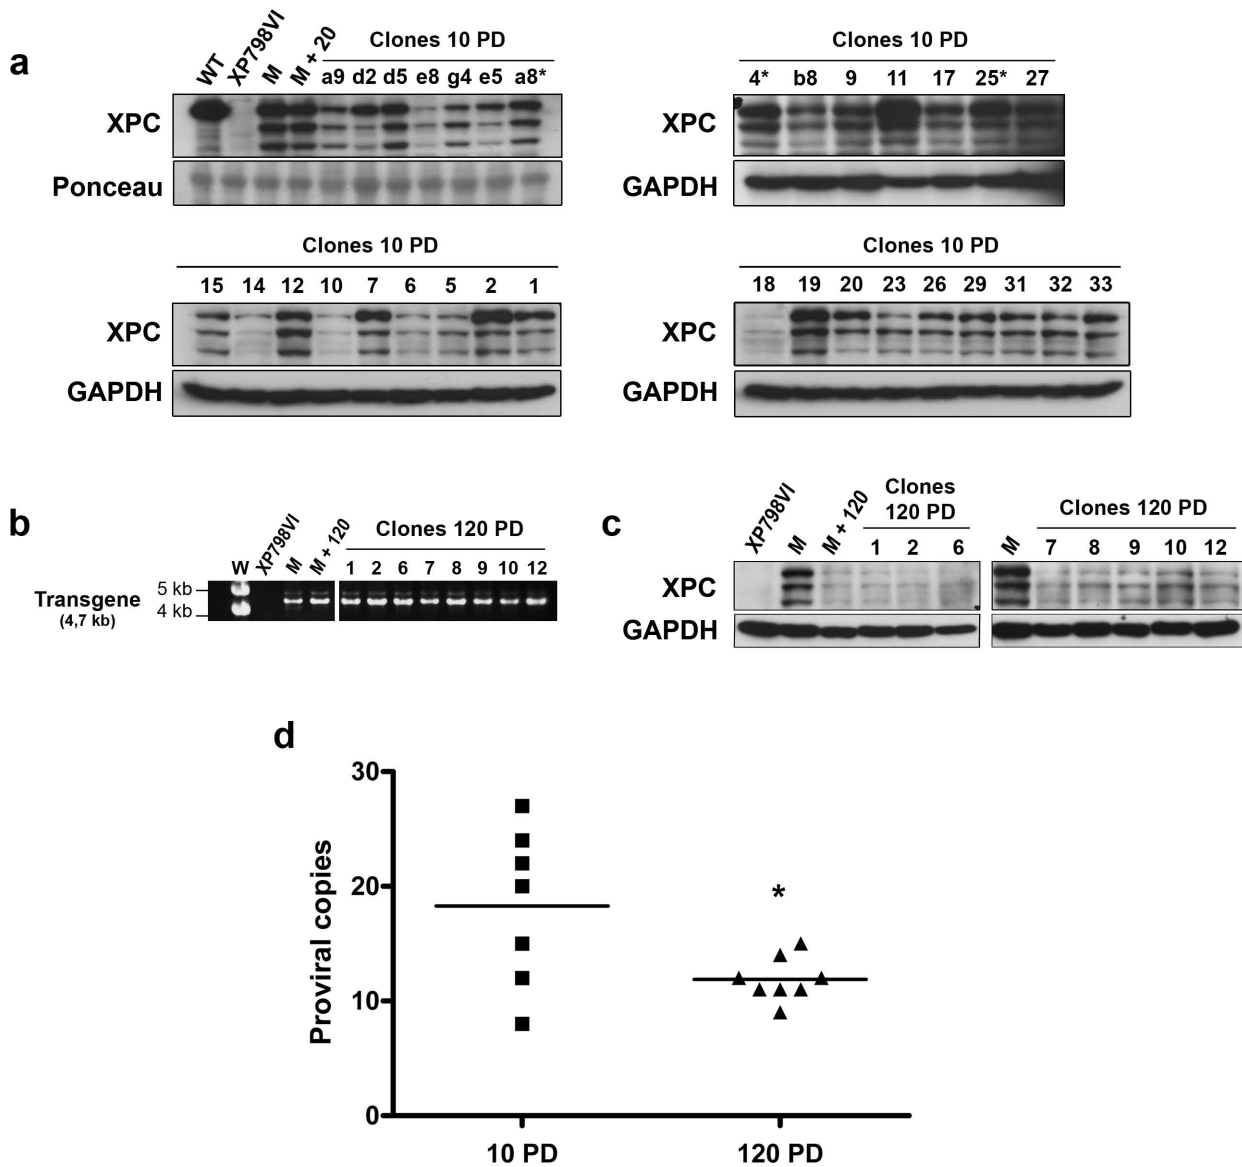

Supplement: mt2011233x2.pdf [file mt2011233x2.pdf]

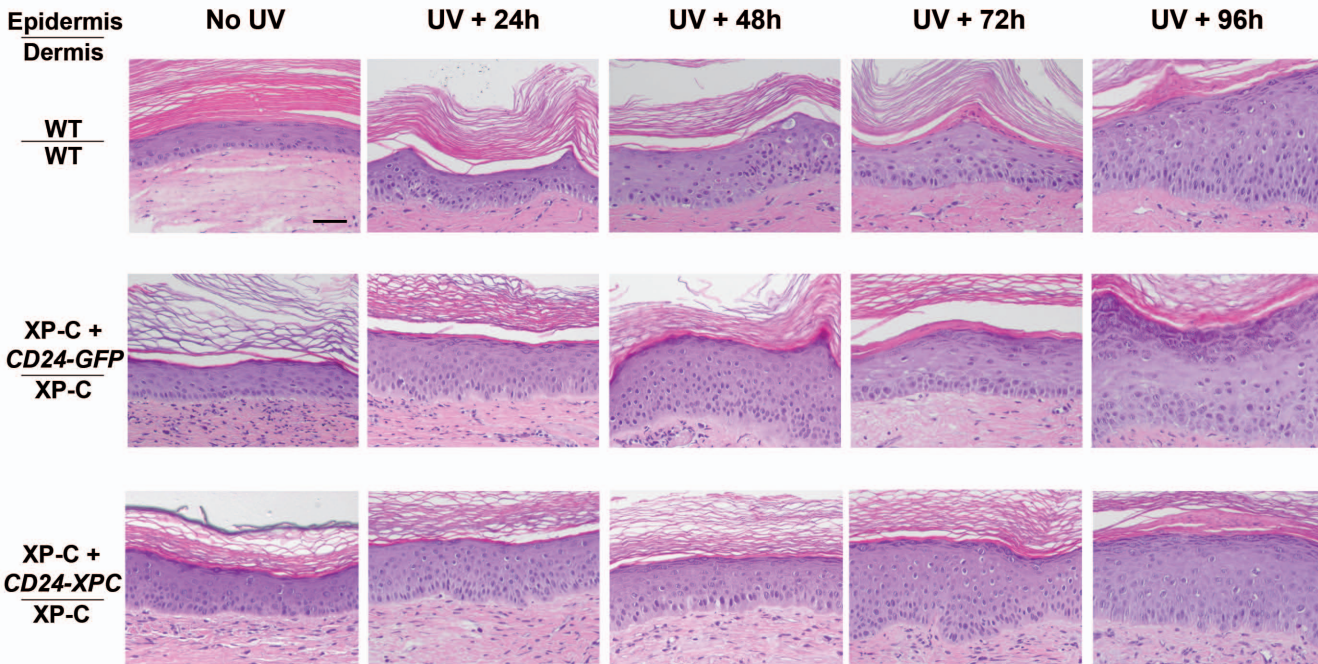

Supplement: mt2011233x3.pdf [file mt2011233x3.pdf]
